# Supplementary material
Source: MDPI journal article supplement (https://www.mdpi.com/1424-8247/15/2/154)
Supplement: s1 [file s1]

Archive with 4 entries (4 files):
- Supplementary File S1 The 1D- and 2D-NMR spectroscopic data.pdf
- Supplementary File S2 Photos of MDA-MB-231, A549 and HCT-116 cancer cell lines and normal cell line NIH-3T3 at different concentrations of TME.pdf
- Supplementary File S3 Photos of A549 cells pretreated with CLX, showing cell migration and in-vasion.pdf
- Supplementary File S4 QC file of RT-PCR and quantitative analysis of flow cytometry.pdf
