# Supplementary material
Source: MDPI journal article supplement (https://www.mdpi.com/1424-8247/15/2/154)
Supplement: s1 [file s1 › Supplementary File S1 The 1D- and 2D-NMR spectroscopic data.pdf]

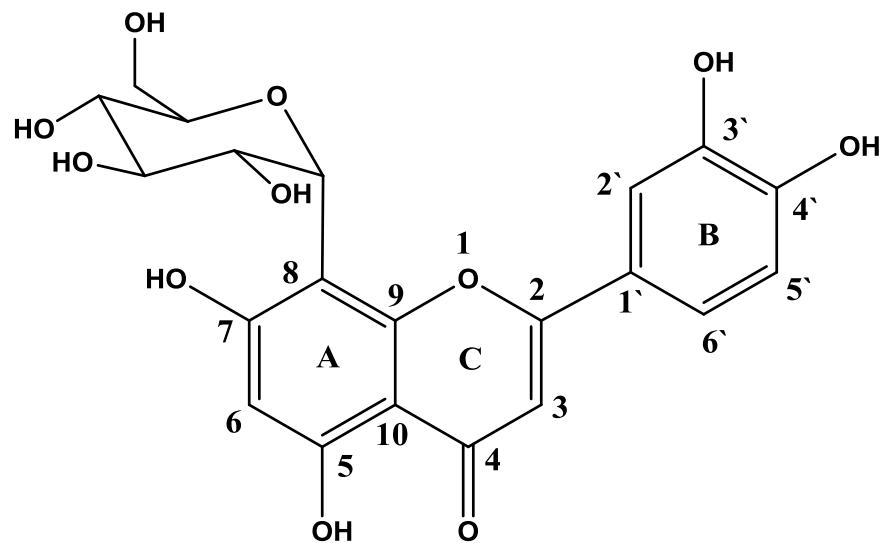

**Structure of orientin**

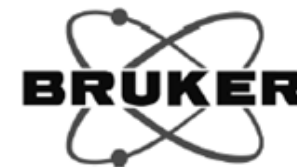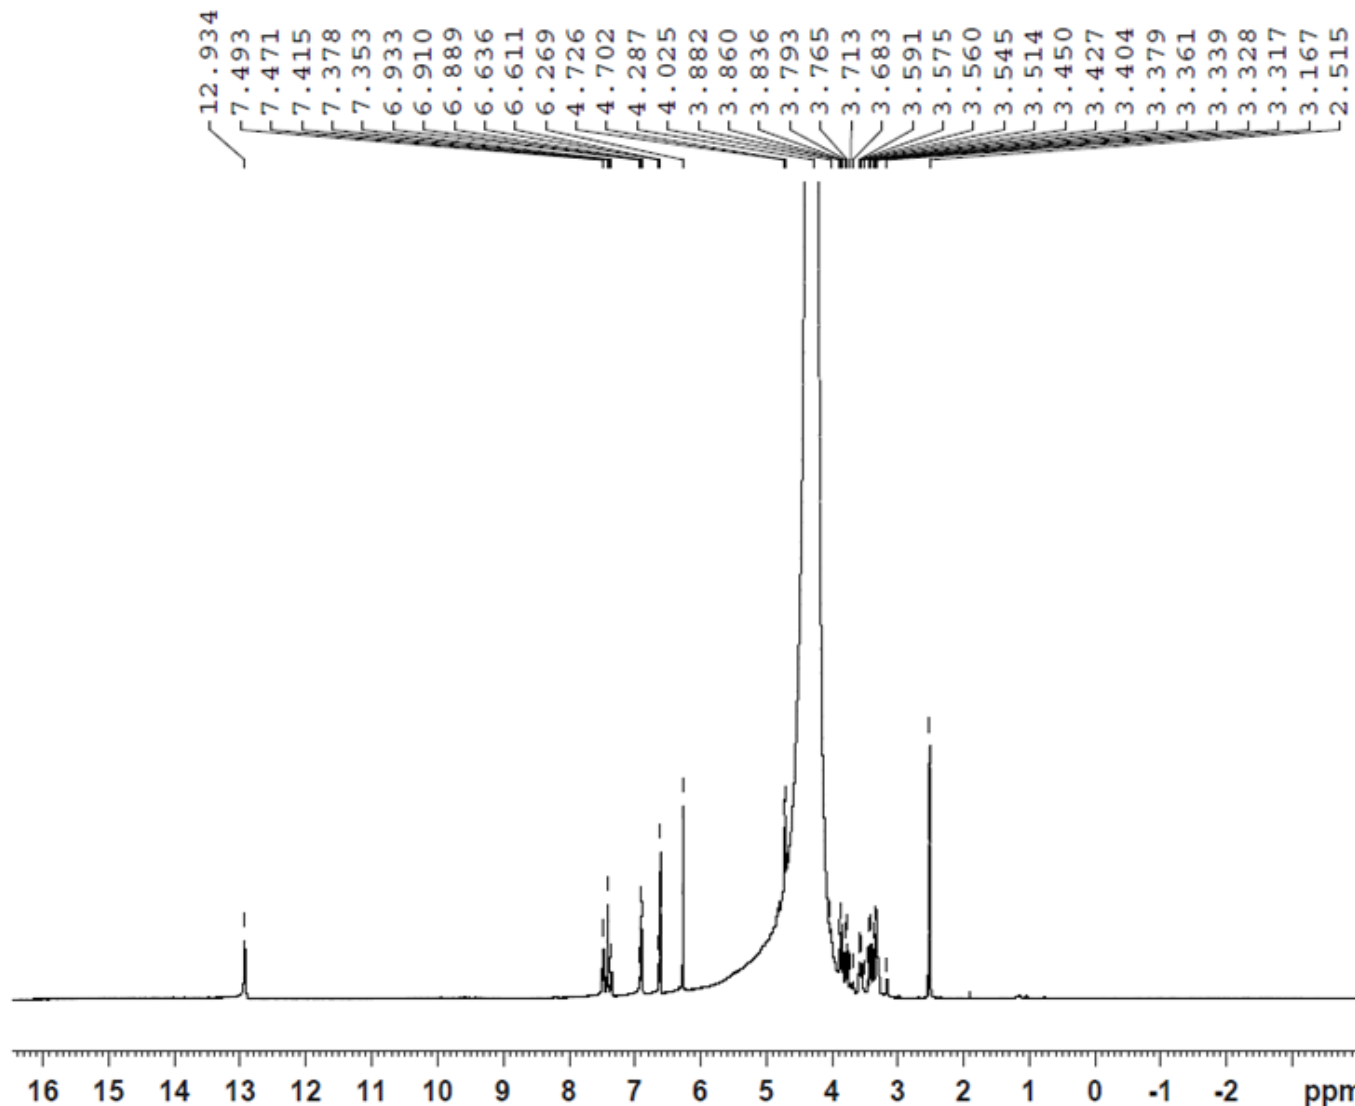

Current Data Parameters  
 NAME HE-CM-2  
 EXPNO 30  
 PROCNO 1

F2 - Acquisition Parameters  
 Date\_ 20160612  
 Time\_ 15.10  
 INSTRUM spect  
 PROBHD 5 mm PABBO BB/  
 PULPROG zg30  
 TD 65536  
 SOLVENT DMSO  
 NS 70  
 DS 2  
 SWH 8223.685 Hz  
 FIDRES 0.125483 Hz  
 AQ 3.9846387 sec  
 RG 6.2  
 DW 60.800 usec  
 DE 6.50 usec  
 TE 297.1 K  
 D1 1.00000000 sec  
 TD0 1

===== CHANNEL f1 =====  
 NUC1 1H  
 P1 15.00 usec  
 PLW1 9.60000038 W  
 SFO1 400.1324710 MHz

F2 - Processing parameters  
 SI 65536  
 SF 400.1300000 MHz  
 WDW EM  
 SSB 0  
 LB 0.30 Hz  
 GB 0  
 PC 1.00

1-<sup>1</sup>H NMR full spectrum of orientin, (400 MHz, DMSO-d<sub>6</sub>)

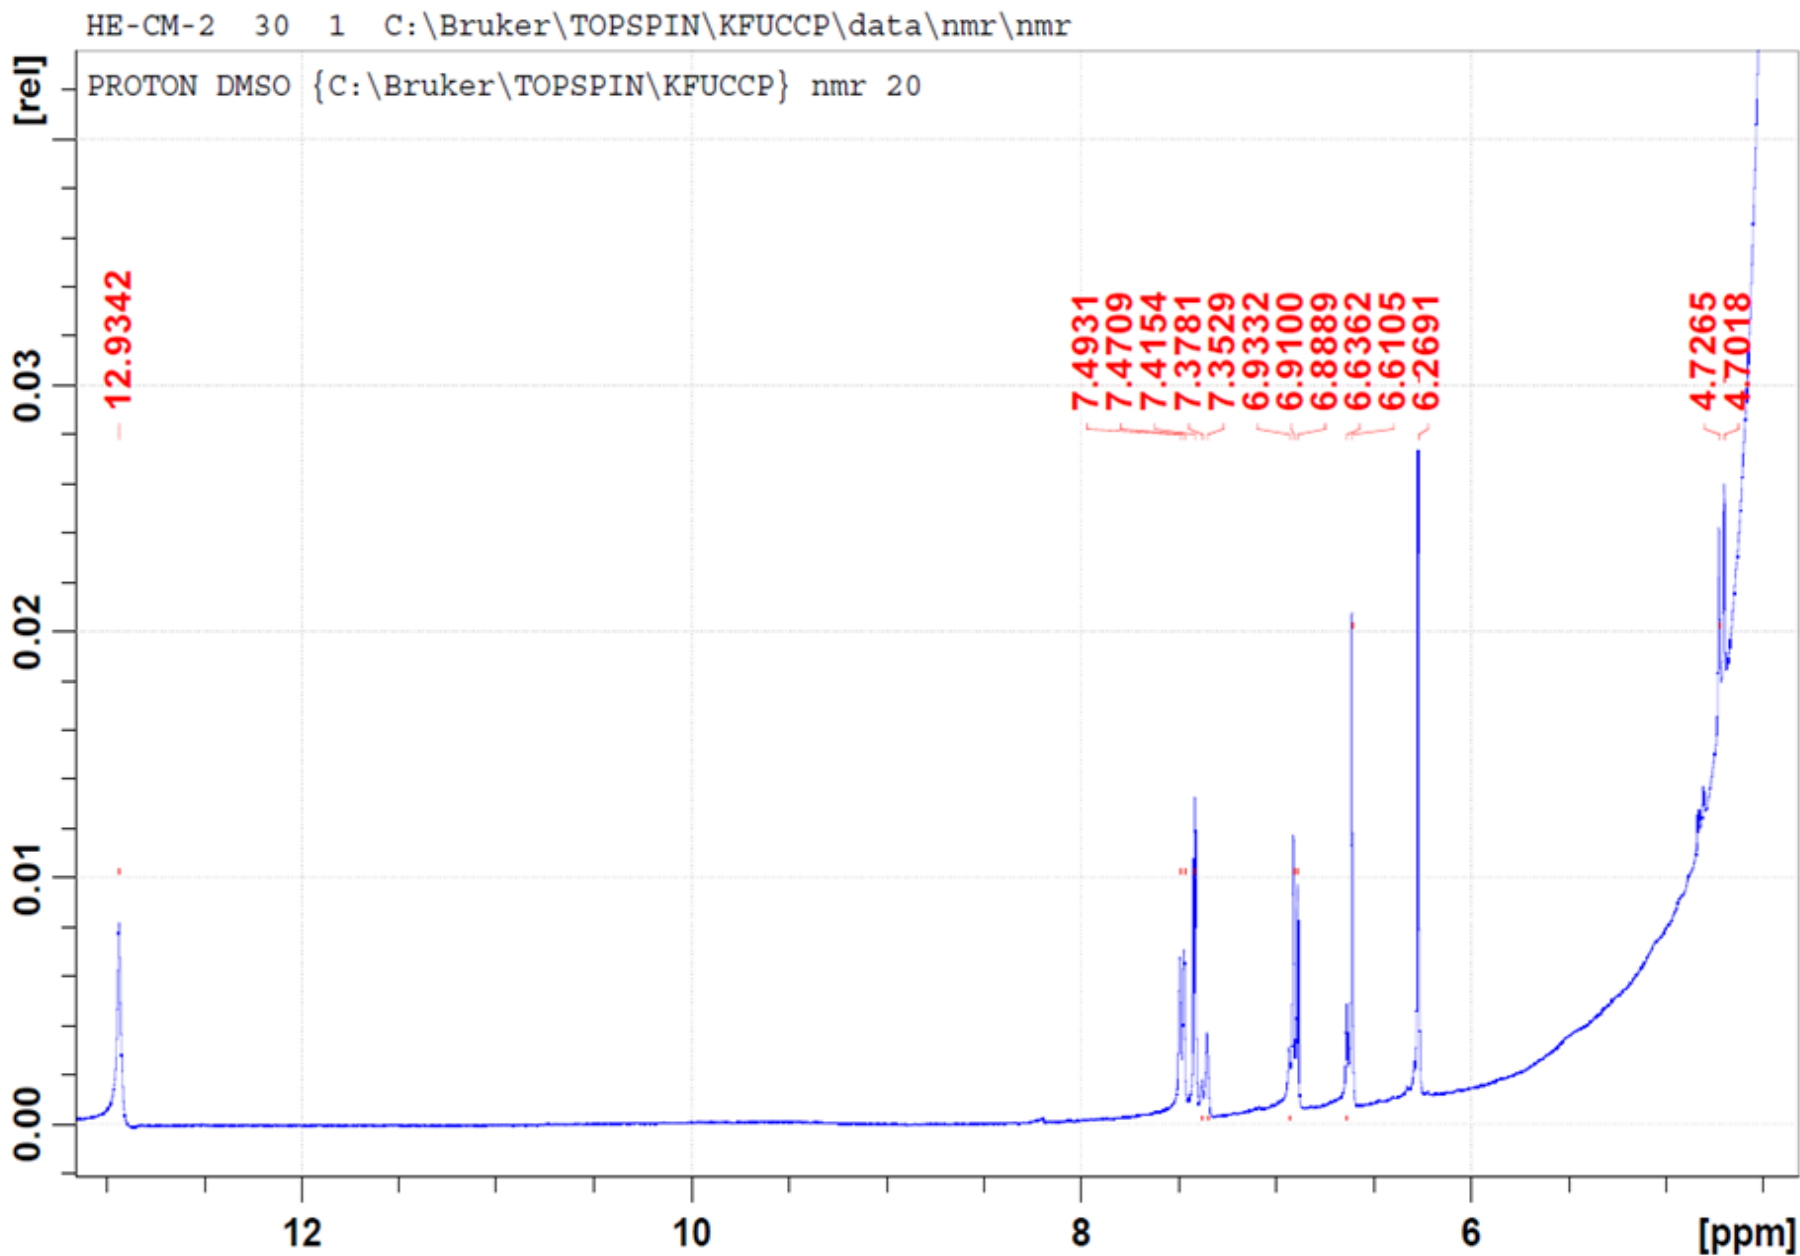

2- Expanded  $^1\text{H}$  NMR spectrum orientin, (400 MHz, DMSO- $d_6$ ).

C13CPD DMSO {C:\Bruker\TOPSPIN\KFUCCP} nmr 20

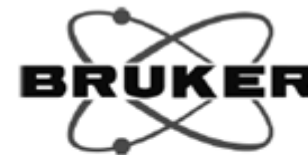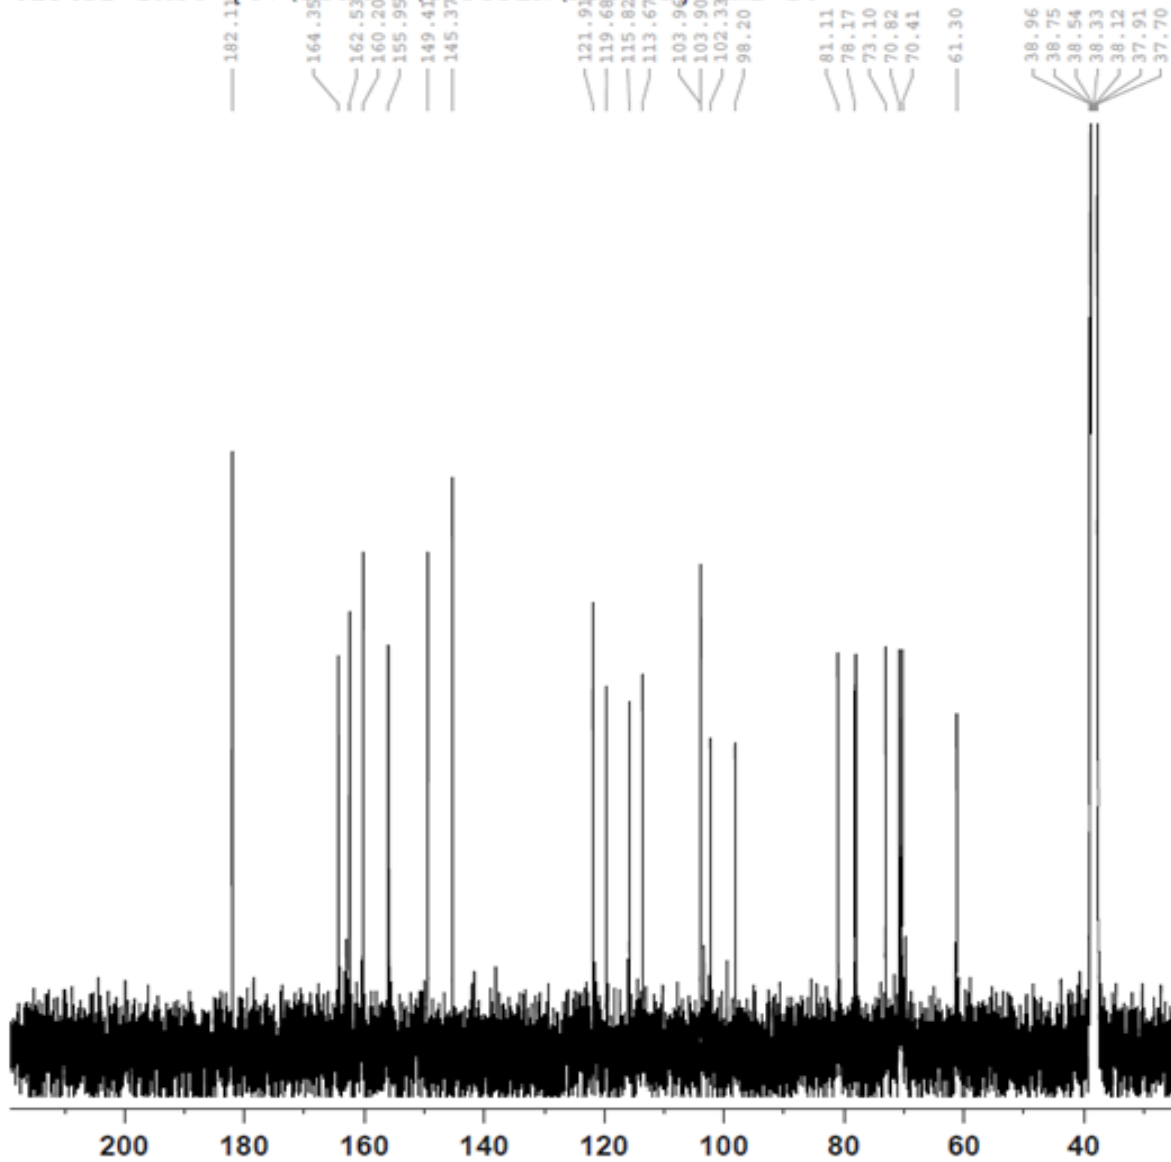

Current Data Parameters  
NAME HE-CM-2  
EXPNO 31  
PROCNO 1

F2 - Acquisition Parameters  
Date 20160612  
Time 19.57  
INSTRUM spect  
PROBHD 5 mm PABBO BB/  
PULPROG zgpg30  
TD 65536  
SOLVENT DMSO  
NS 5000  
DS 4  
SWH 24038.461 Hz  
FIDRES 0.366798 Hz  
AQ 1.3631988 sec  
RG 189.35  
DW 20.800 usec  
DE 6.50 usec  
TE 298.8 K  
D1 2.00000000 sec  
D11 0.03000000 sec  
TD0 1

===== CHANNEL f1 =====  
NUC1 13C  
P1 10.00 usec  
PLW1 54.00000000 W  
SFO1 100.6228293 MHz

===== CHANNEL f2 =====  
CPDPRG2 waltz16  
NUC2 1H  
PCPD2 90.00 usec  
PLW2 9.60000038 W  
PLW12 0.26666999 W  
PLW13 0.21600001 W  
SFO2 400.1316005 MHz

F2 - Processing parameters  
SI 32768  
SF 100.6128193 MHz  
WDW EM  
SSB 0  
LB 1.00 Hz  
GB 0  
PC 1.40

3-<sup>13</sup>C NMR full spectrum of orientin, (100 MHz, DMSO-*d*<sub>6</sub>)

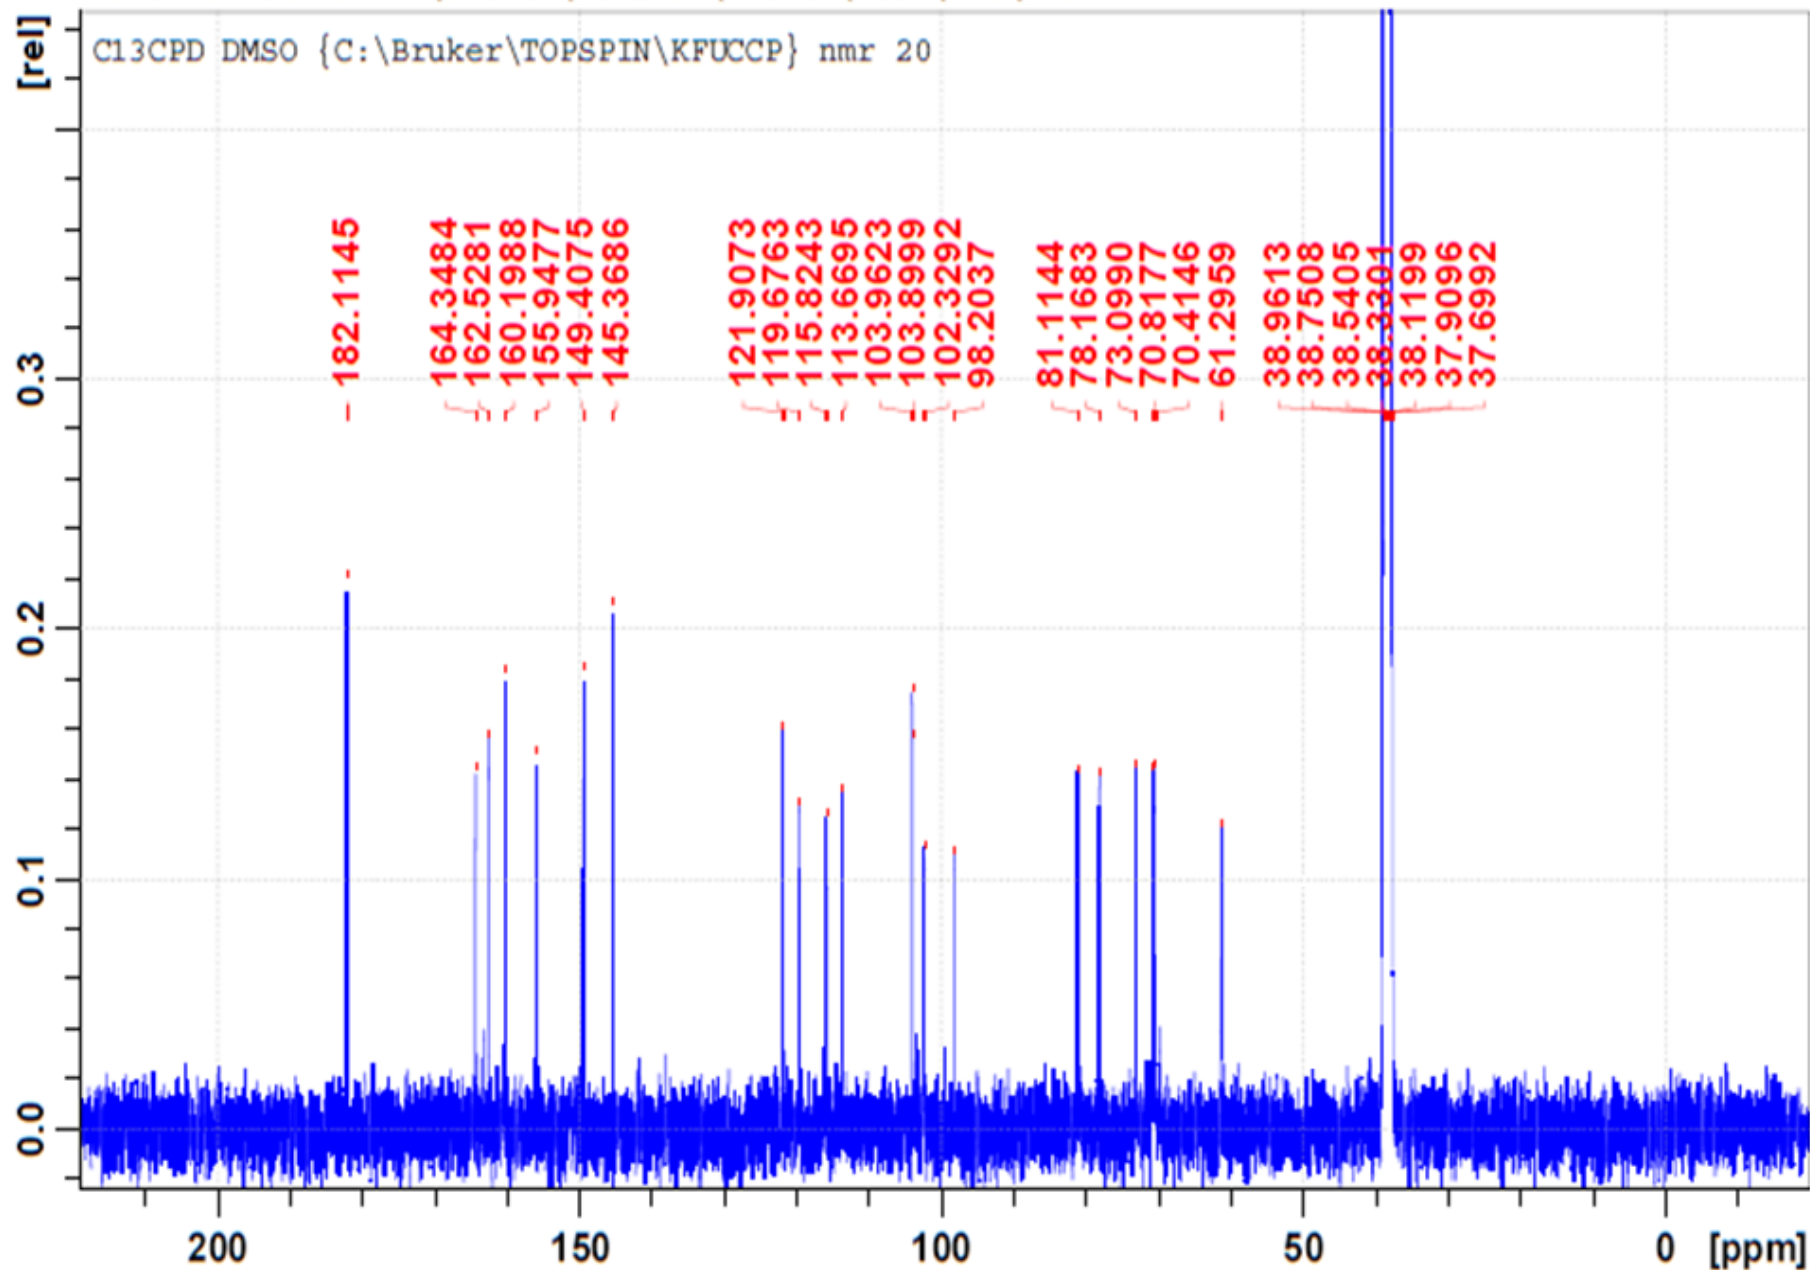

4- Expanded  $^{13}\text{C}$  NMR spectrum of orientin, (100 MHz, DMSO- $d_6$ )

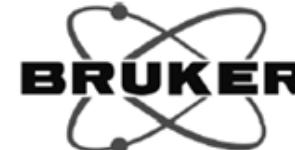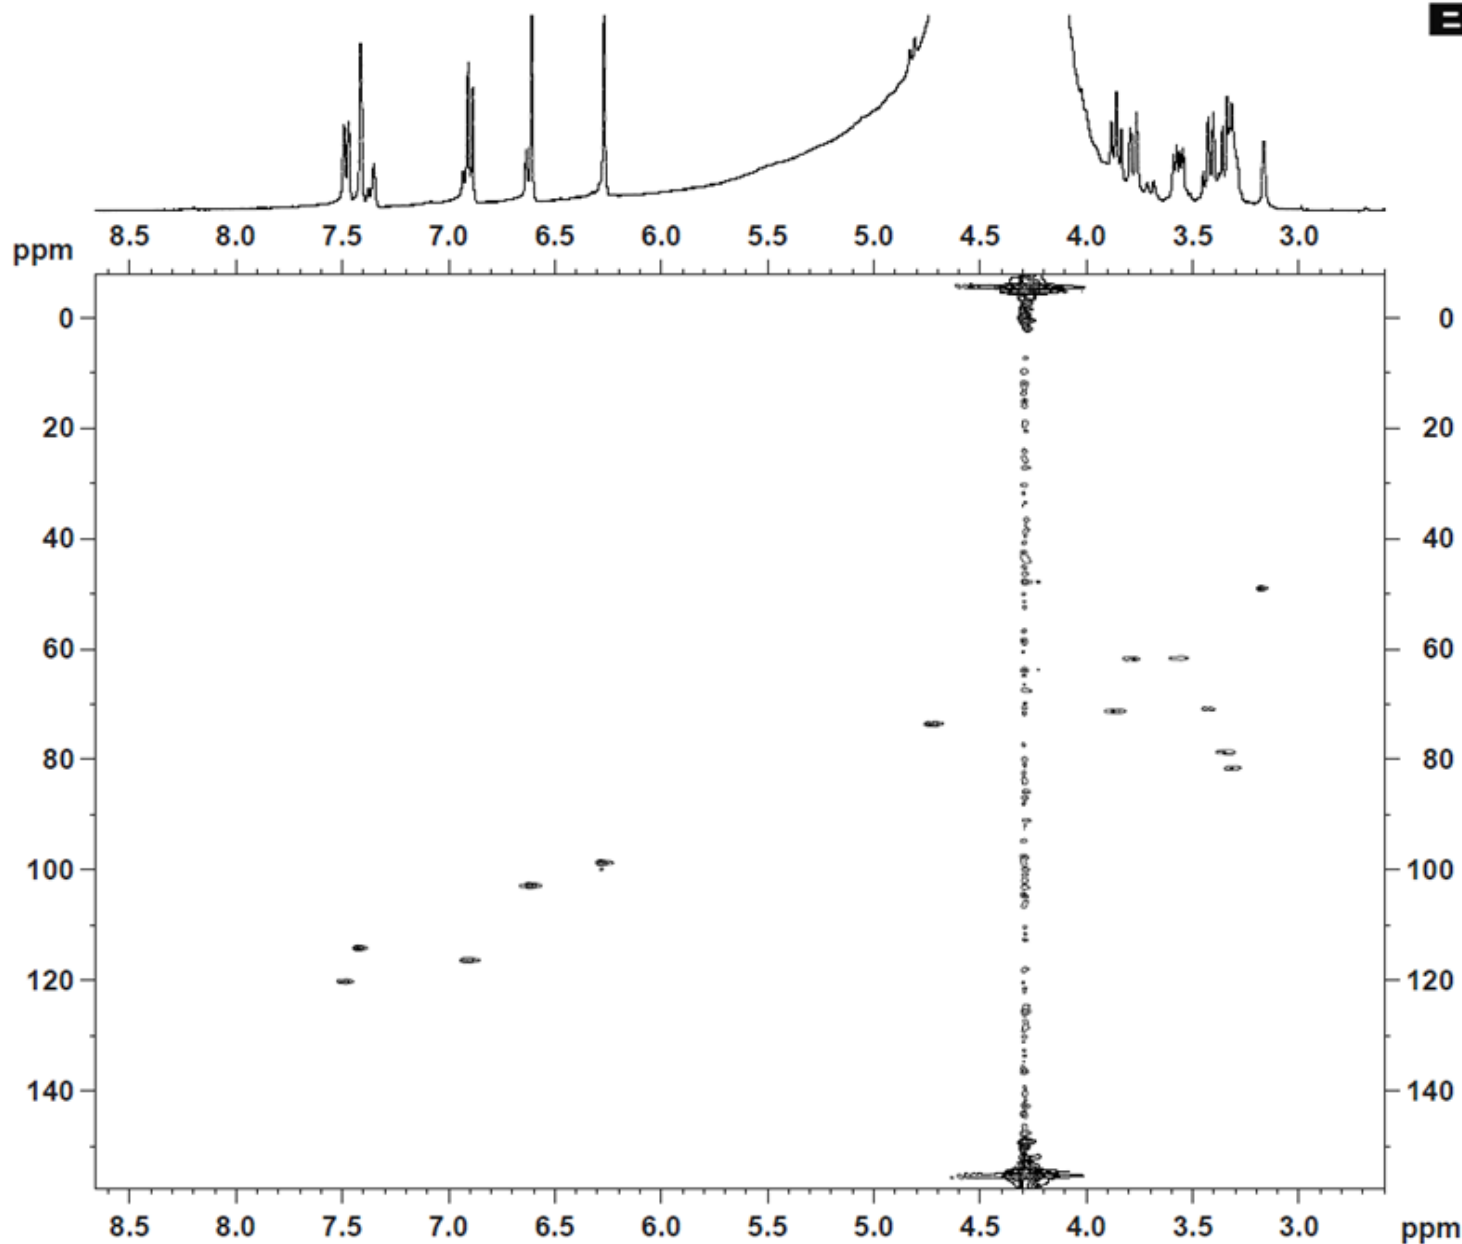

Current Data Parameters  
NAME HK-OM-2  
EXPNO 33  
PROCNO 1

F2 - Acquisition Parameters  
Date\_ 20160612  
Time 22.49  
INSTRUM spect  
PROBHD 5 mm PABBO BB/  
PULPROG hsqcetgpgp12  
TD 1024  
SOLVENT DMSO  
NS 4  
DS 16  
SWH 2427.185 Hz  
FIDRES 2.376297 Hz  
AQ 0.2109940 sec  
RG 189.35  
SM 206.000 usec  
SE 6.50 usec  
TE 298.0 K  
CMT2 145.0000000  
DO 0.0000300 sec  
D1 1.38510704 sec  
D4 0.00172414 sec  
D11 0.03000000 sec  
D16 0.00020000 sec  
D24 0.00086207 sec  
IN0 0.00003000 sec  
ECHOPTNS

----- CHANNEL f1 -----  
NUC1 1H  
P1 15.00 usec  
P2 30.00 usec  
P28 0 usec  
PLW1 9.60000038 W  
SFO1 400.1322521 MHz

----- CHANNEL f2 -----  
CPCPRG2 garp  
NUC2 13C  
P3 10.00 usec  
P4 20.00 usec  
PCPD2 80.00 usec  
PLW2 54.00000000 W  
PLW12 0.84375000 W  
SFO2 100.6203124 MHz

----- GRADIENT CHANNEL -----  
GPMAM1 SMDQ10.100  
GPMAM2 SMDQ10.100  
GPMAM3 SMDQ10.100  
GPMAM4 SMDQ10.100  
GPZ1 80.00 %  
GPZ2 20.10 %  
GPZ3 11.00 %  
GPZ4 -5.00 %  
P16 1000.00 usec  
P19 600.00 usec

F1 - Acquisition parameters  
TD 256  
SFO1 100.6203 MHz  
FIDRES 65.108414 Hz  
SW 165.650 ppm  
PRMDE Echo-Antiecho

F2 - Processing parameters  
SI 1024  
SF 400.1300000 MHz  
MCW QSIHQ  
SSB 2  
LB 0 Hz  
GB 0  
PC 1.40

F1 - Processing parameters  
SI 1024  
MC2 echo-antiecho  
SF 100.6127690 MHz  
MCW H  
SSB 2  
LB 0 Hz  
GB 0

5- HSQC full spectrum of orientin

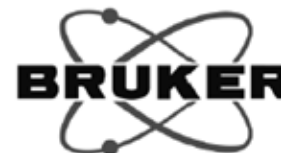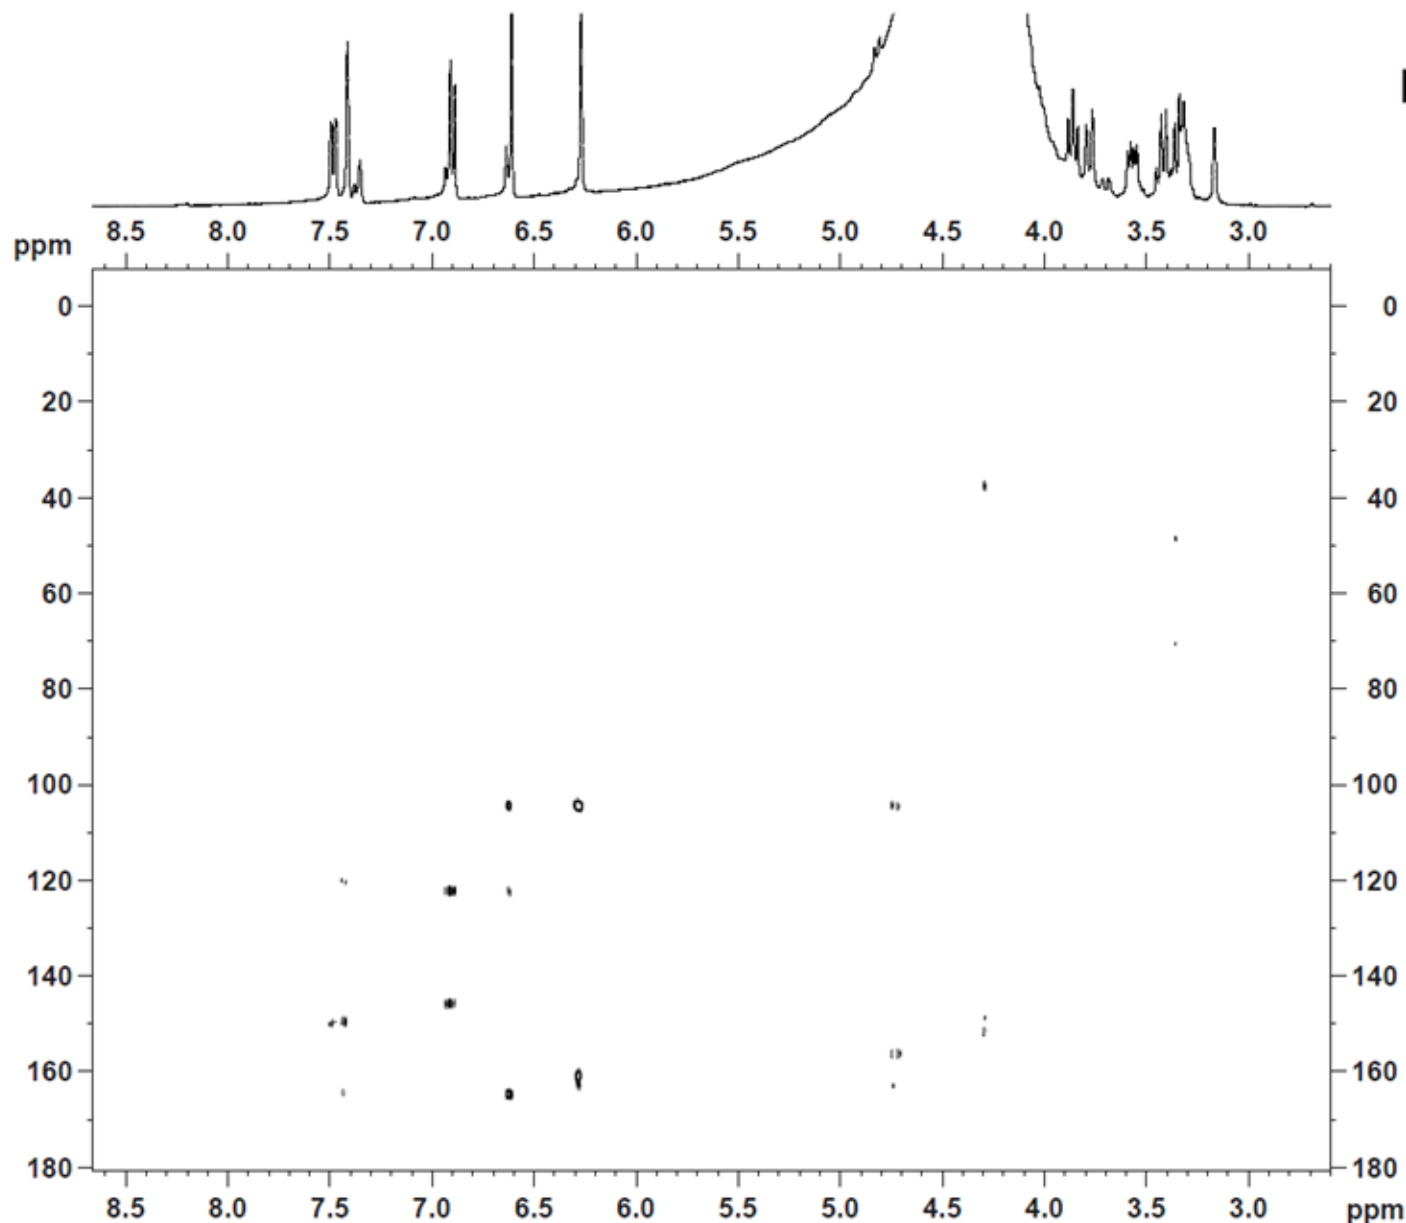

Current Data Parameters  
NAME HE-CM-2  
EXPNO 34  
PROCNO 1

F2 - Acquisition Parameters  
Date\_ 20160612  
Time 23.18  
INSTRUM spect  
PROBHD 5 mm PABBO BB/  
PULPROG hmbcggplndgqf  
TD 2048  
SOLVENT DMSO  
NS 8  
DS 16  
SWH 2427.185 Hz  
FIDRES 1.185149 Hz  
AQ 0.4219380 sec  
RG 189.35  
DW 206.000 usec  
DE 6.50 usec  
TE 297.9 K  
CNS12 145.0000000  
CNS13 10.0000000  
D0 0.00000300 sec  
D1 1.27471995 sec  
D2 0.00344828 sec  
D6 0.05000000 sec  
D16 0.00020000 sec  
IN0 0.00002235 sec

----- CHANNEL f1 -----  
NUC1 1H  
P1 15.00 usec  
P2 30.00 usec  
PLW1 9.60000038 W  
SFO1 400.1322521 MHz

----- CHANNEL f2 -----  
NUC2 13C  
P3 10.00 usec  
PLW2 54.00000000 W  
SFO2 100.6228133 MHz

----- GRADIENT CHANNEL -----  
GPHAM1 SMSQ10.100  
GPHAM2 SMSQ10.100  
GPHAM3 SMSQ10.100  
GPZ1 50.00 %  
GPZ2 30.00 %  
GPZ3 40.10 %  
P16 1000.00 usec

F1 - Acquisition parameters  
TD 128  
SFO1 100.6228 MHz  
FIDRES 174.592422 Hz  
SW 222.095 ppm  
PnMODE QP

F2 - Processing parameters  
SI 2048  
SF 400.1300000 MHz  
WDW SINE  
SSB 0  
LB 0 Hz  
GB 0  
PC 1.40

F1 - Processing parameters  
SI 1024  
PC 1024  
SF 100.6127690 MHz  
WDW 0  
SSB 0 Hz  
LB 0  
GB 0

**6- HMBGCP full spectrum of orientin**
