# Supplementary material
Source: MDPI journal article supplement (https://www.mdpi.com/1424-8247/15/2/154)
Supplement: s1 [file s1 › Supplementary File S2 Photos of MDA-MB-231, A549 and HCT-116 cancer cell lines and normal cell line NIH-3T3 at different concentrations of TME.pdf]

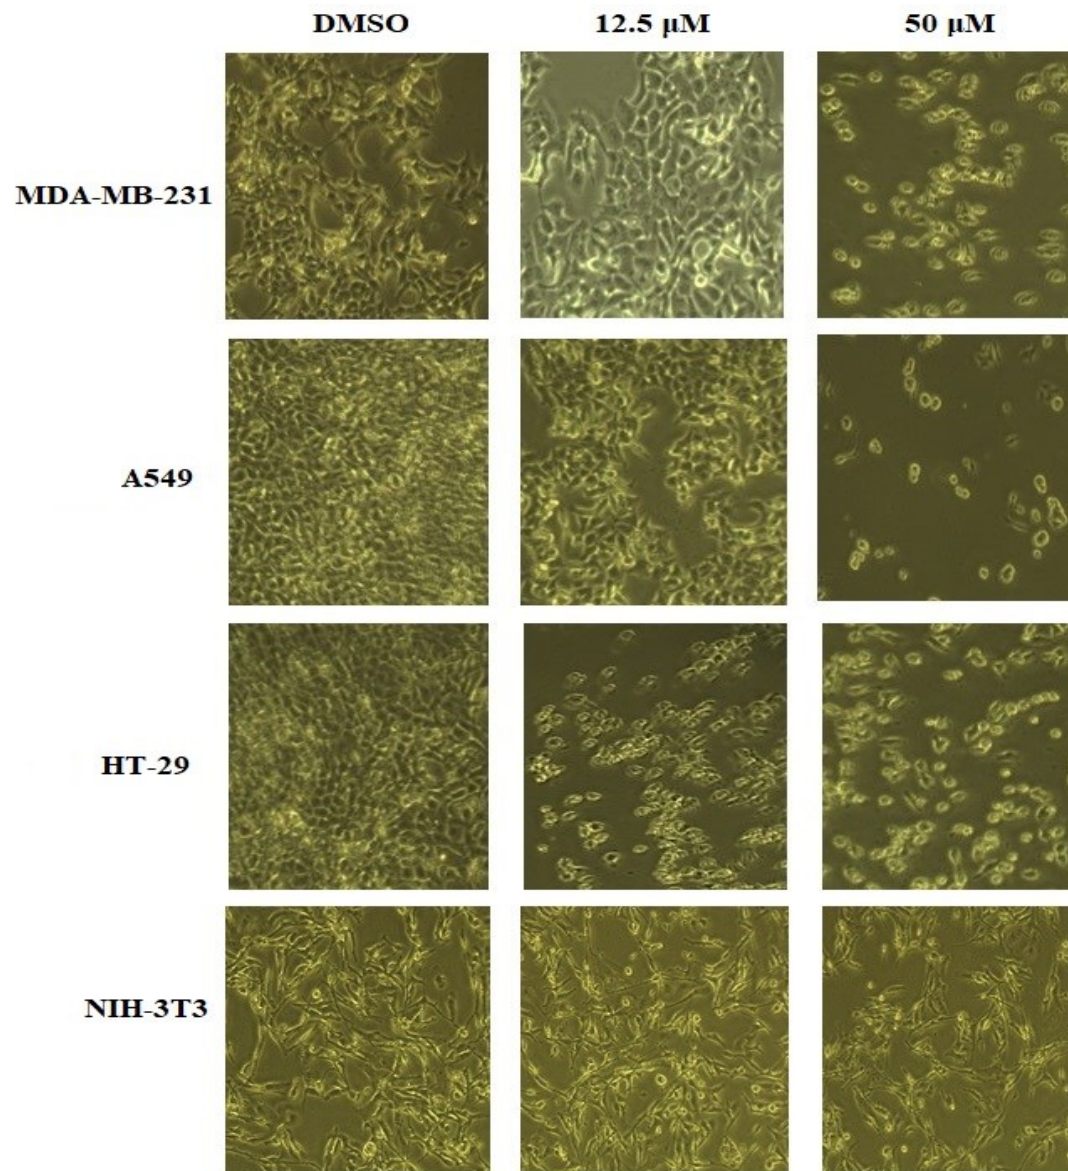

**S2: Photos of MDA-MB-231, A549 and HCT-116 cancer cell lines and normal cell line NIH-3T3 at different concentrations of TME and OT**
