# Supplementary material
Source: MDPI journal article supplement (https://www.mdpi.com/1424-8247/15/2/154)
Supplement: s1 [file s1 › Supplementary File S4 QC file of RT-PCR and quantitative analysis of flow cytometry.pdf]

QC-file of RT-PCR and quantitative analysis of flow-cytometry

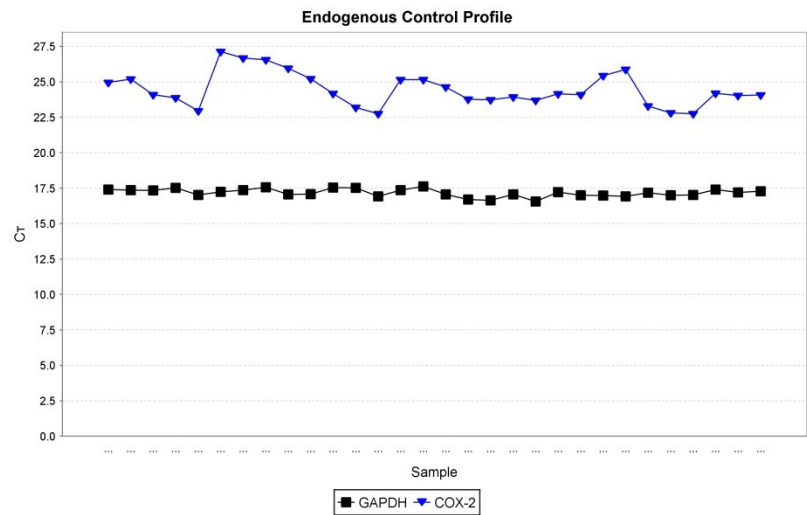

QC for fig. 3D COX-2

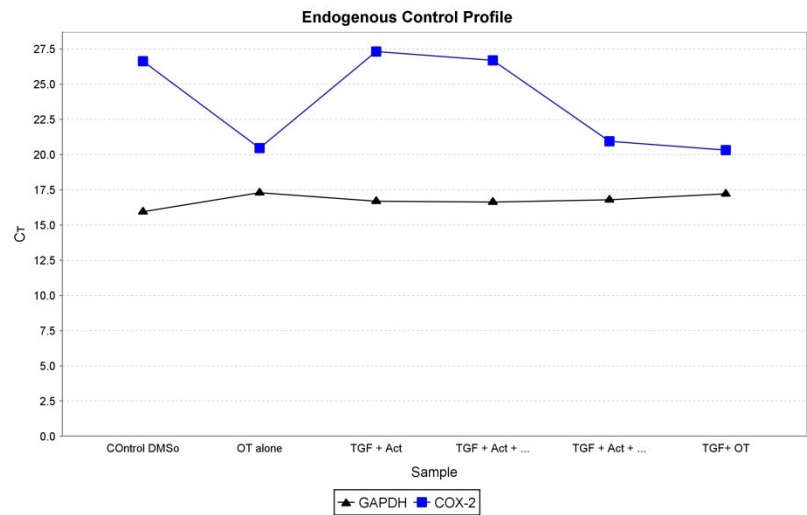

QC for fig. 3K Micro-RNA stability

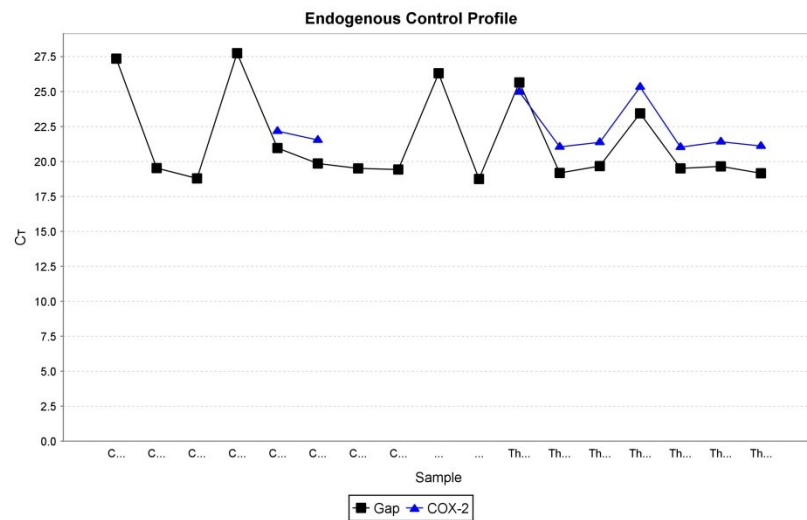

QC for fig. 5E clx cox

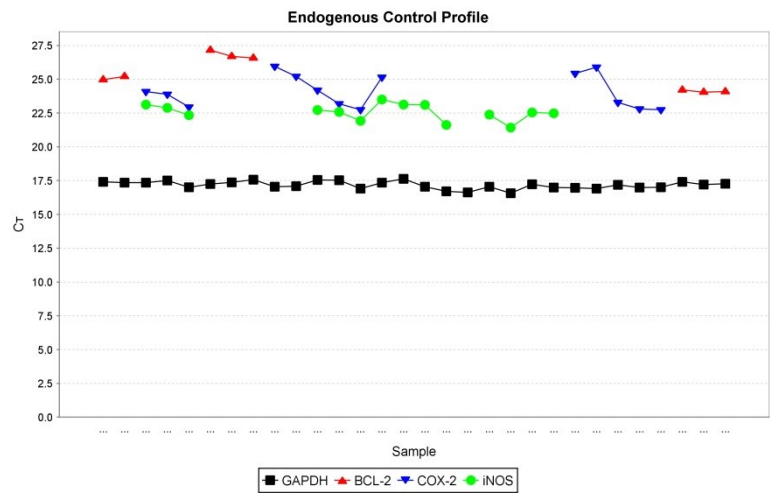

QC for fig. 5H BCL-2, COX-2, iNOS

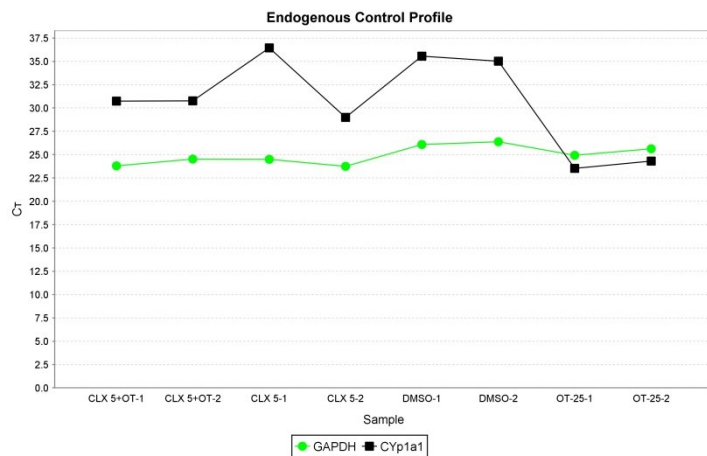

**QC for fig-5E CYP-1A1**

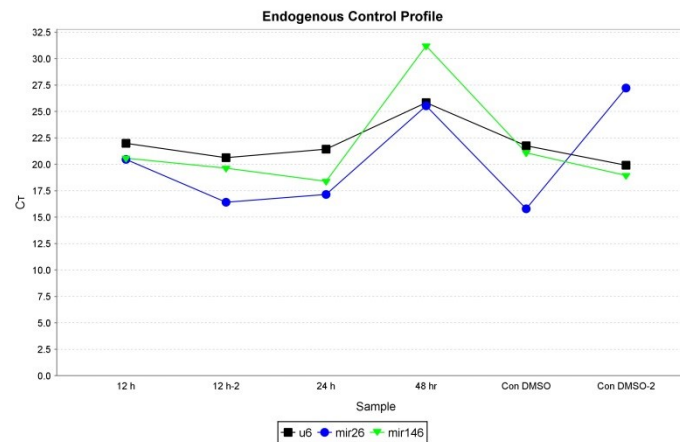

**QC for fig. 7A miR-146 mir-26**

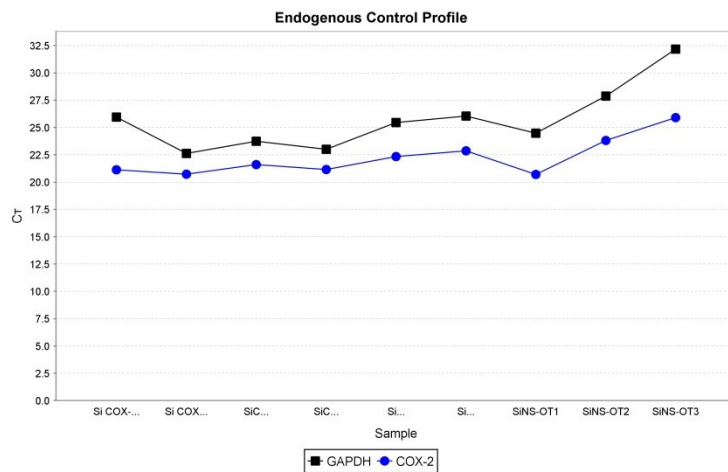

**QC for fig.7C si-cox-2**

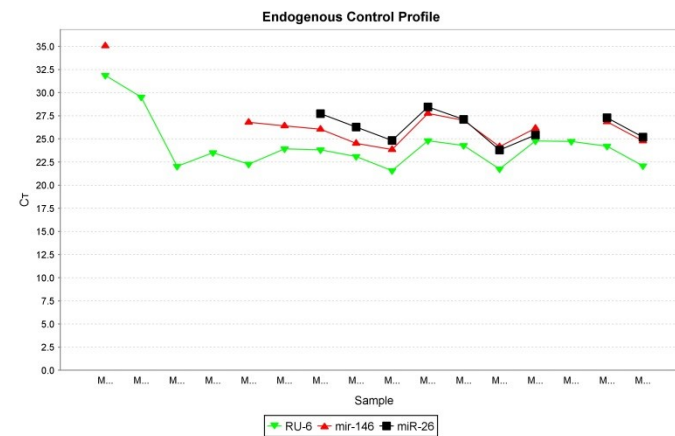

**QC for fig. 7F si-cox-2 miR-146 mir-26**

Table S1: Cytometric quantification of OT on apoptotic modifications in A549 lung cancer cell lines challenged with CLX.

| <b>Population</b> | <b>CLX 5μM</b> | <b>CLX 5μM + OT 25 μM</b> | <b>OT-25 μM</b> |
|-------------------|----------------|---------------------------|-----------------|
| Population all    | 16248          | 17542                     | 15972           |
| R1                | 97             | 7753                      | 3530            |
| R2                | 210            | 8421                      | 4121            |

R1- Apoptotic gating region; R2- Necrotic gating region

Table S2: Cytometric quantification of OT effect on apoptosis in silenced COX-2 transfected A549 cancer cell lines.

| <b>Population</b> | <b>SiNS</b> | <b>SiNS-OT-25 μM</b> | <b>Si-COX-2</b> | <b>Si-Cox-2 OT-25 μM</b> |
|-------------------|-------------|----------------------|-----------------|--------------------------|
| Population all    | 12432       | 13534                | 13329           | 12762                    |
| R1                | 385         | 3225                 | 1055            | 3752                     |
| R2                | 435         | 1488                 | 2132            | 5104                     |

R1- Apoptotic gating region; R2- Necrotic gating region
