# Supplementary material
Source: MDPI journal article supplement (https://www.mdpi.com/1424-8247/15/2/154)

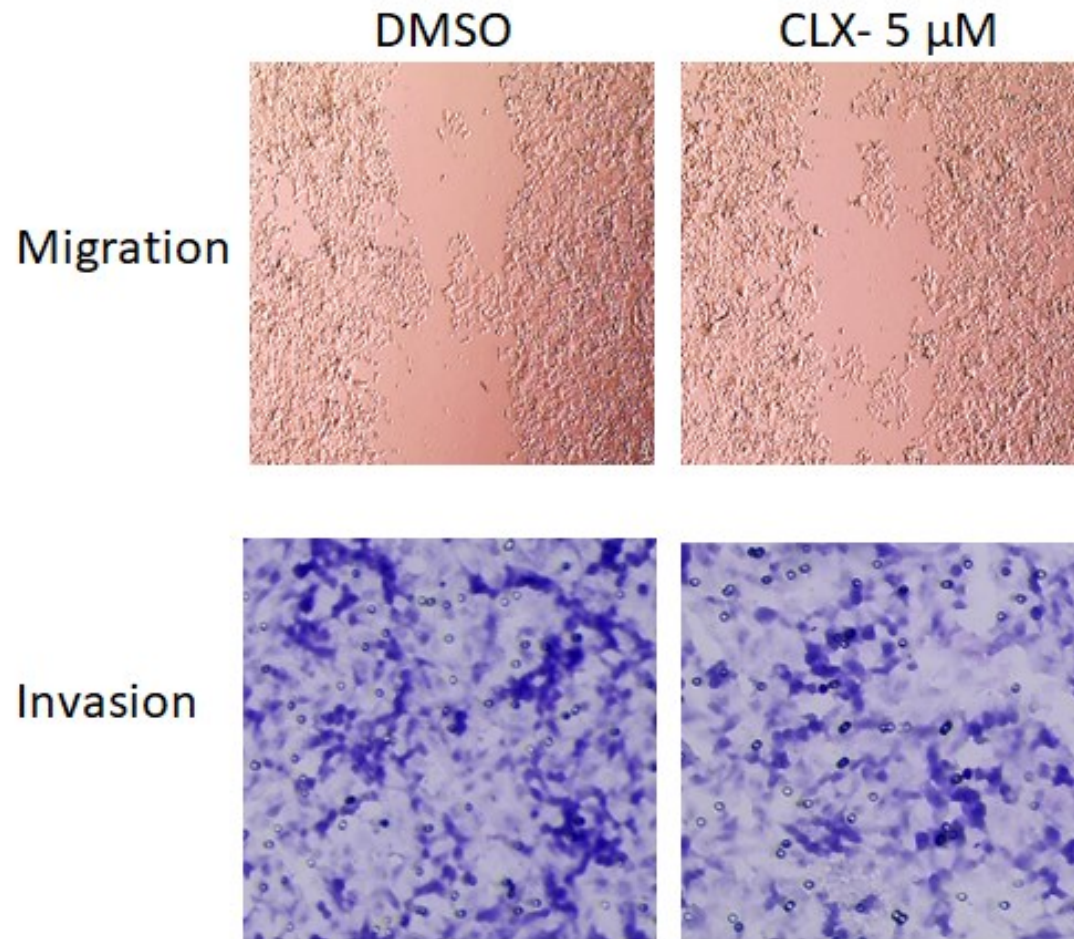

S3: Photos of A549 cells pretreated with CLX, showing cell migration and invasion

Supplement: s1 [file s1]
